# Supplementary material for: Diagnostic Role of Four-Dimensional Computed Tomography for Preoperative Parathyroid Localization in Patients with Primary Hyperparathyroidism: A Systematic Review and Meta-Analysis
Source: MDPI journal article supplement (doi:10.3390/diagnostics11040664), 2021-04-07
Supplement: s1 [file s1]

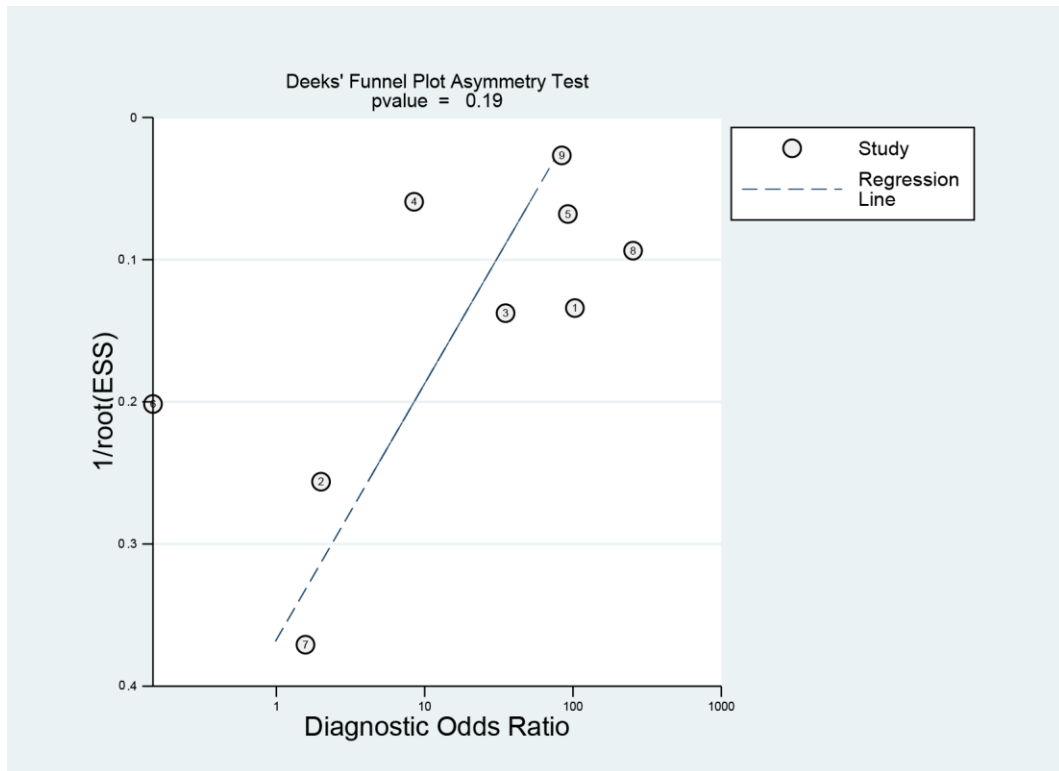

**Figure S1.** Deeks funnel plot asymmetry test for publication bias of 4D-CT for detecting HPG(s) on a per-lesion level.

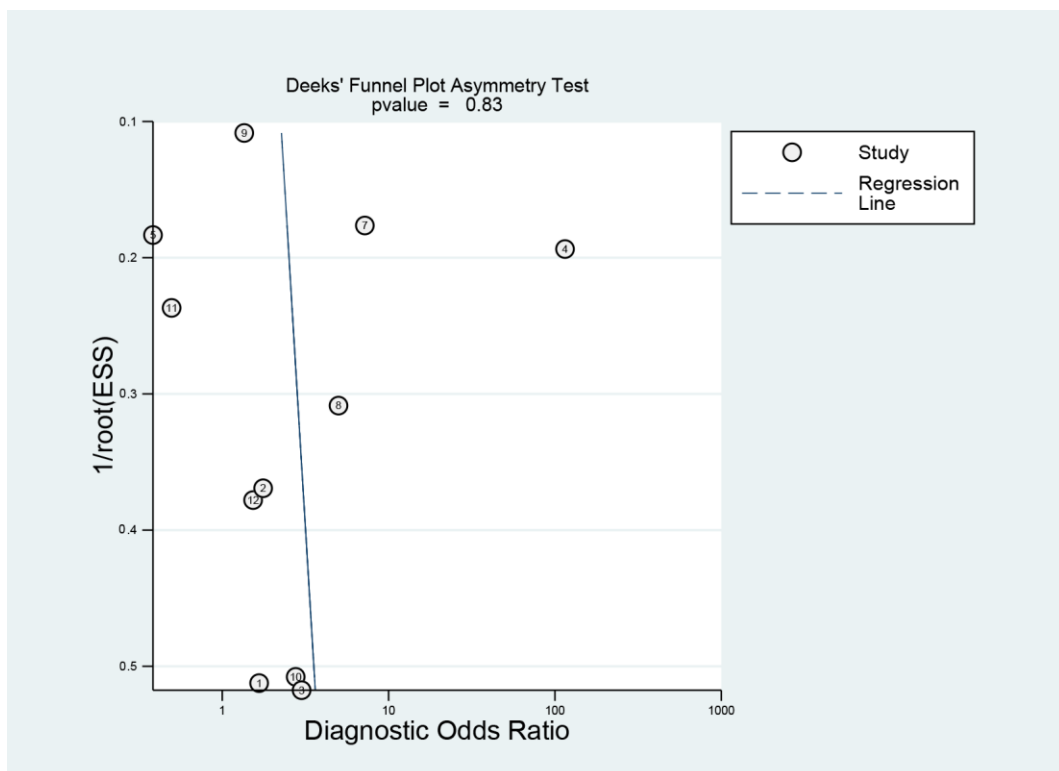

**Figure S2.** Deeks funnel plot asymmetry test for publication bias of 4D-CT for detecting HPG(s) on a per-patient level.
